# Supplementary material
Source: publisher figshare collection journal article supplement (https://acs.figshare.com/ndownloader/files/4453972)
Supplement: Supplementary file 1 [file 4453972]

D1:

Online dual gradient reversed-phase / porous graphitized carbon nanoHPLC for proteomic applications

*Urs Lewandrowski\* and Albert Sickmann*

Leibniz Institut für Analytische Wissenschaften – ISAS e.V.; Otto-Hahn-Strasse 6b; 44227 Dortmund; Germany

File contains the gradient program used for the U3000 dual gradient separations. The command style is from Chromeleon Software (Dionex, Germany).

UV\_VIS\_1.Wavelength = 214 [nm]  
UV\_VIS\_1.Step = 0.20 [s]  
UV\_VIS\_1.Average = On  
UV\_VIS\_2.Wavelength = 295 [nm]  
UV\_VIS\_2.Step = 0.20 [s]  
UV\_VIS\_2.Average = On  
ColumnCompartment1.ValveLeft = 10\_1  
ColumnCompartment1.ValveRight = 1\_2 ; column 1 is in line with UV  
ColumnCompartment2.ValveLeft = 10\_1

0.000 Autozero

NanoPump1.Flow = 0.220 [μl/min]  
NanoPump1.%B = 7.0 [%]  
NanoPump1.%C = 0.0 [%]  
NanoPump2.Flow = 0.260 [μl/min]  
NanoPump2.%B = 7.0 [%]  
NanoPump2.%C = 0.0 [%]

Inject

LoadingPump1.Flow = 7 [μl/min]  
LoadingPump1.%B = 0.0 [%]  
LoadingPump1.%C = 0.0 [%]  
NanoPump1.Flow = 0.220 [μl/min]  
NanoPump1.%B = 7.0 [%]  
NanoPump1.%C = 0.0 [%]  
NanoPump2.Flow = 0.260 [μl/min]  
NanoPump2.%B = 7.0 [%]  
NanoPump2.%C = 0.0 [%]

0.100 LTQ.State On

1.000 LTQ.State Off

7.000 ColumnCompartment1.ValveLeft = 1\_2

NanoPump1.%B = 7.0 [%]  
LoadingPump1.Flow = 7 [μl/min]  
NanoPump2.%B = 7.0 [%]

8.000 NanoPump1.%B = 7.0 [%]  
NanoPump2.%B = 7.0 [%]  
LoadingPump1.Flow = 1 [μl/min]

38.000 NanoPump1.%B = 50.0 [%]

42.000 NanoPump1.%B = 95.0 [%]

44.000 NanoPump2.%B = 7.0 [%]

```

45.000 NanoPump2.%B = 7.0 [%]
46.000 LoadingPump1.Flow = 1 [µl/min]
48.000 LoadingPump1.Flow = 7 [µl/min]

50.000 NanoPump1.%B = 95.0 [%]
      ColumnCompartment2.ValveLeft = 1_2
      ColumnCompartment1.ValveRight = 6_1

55.000 NanoPump1.%B = 50.0 [%]
      NanoPump2.%B = 7.0 [%]

80.000 NanoPump1.%B = 7.0 [%]
      ColumnCompartment1.ValveLeft = 10_1

85.000 NanoPump2.%B = 40.0 [%]

90.000 NanoPump2.%B = 90.0 [%]

95.000 NanoPump2.%B = 90.0 [%]

100.000 NanoPump2.%B = 7.0 [%]
      NanoPump1.%B = 7.0 [%]
      ColumnCompartment2.ValveLeft = 10_1

110.000 NanoPump1.%B = 7.0 [%]
      NanoPump2.%B = 7.0 [%]
      LoadingPump1.Flow = 7 [µl/min]

120.000
      NanoPump1.Flow = 0.220 [µl/min]
      NanoPump1.%B = 7.0 [%]
      NanoPump1.%C = 0.0 [%]
      NanoPump2.Flow = 0.260 [µl/min]
      NanoPump2.%B = 7.0 [%]
      NanoPump2.%C = 0.0 [%]
      ColumnCompartment1.ValveRight = 1_2
      ReleaseExclusiveAccess
      End

```
